# Supplementary material
Source: PubMed Central journal article supplement (PMC8009329)
Supplement: NIHMS1677098-supplement-1.pdf [file NIHMS1677098-supplement-1.pdf]

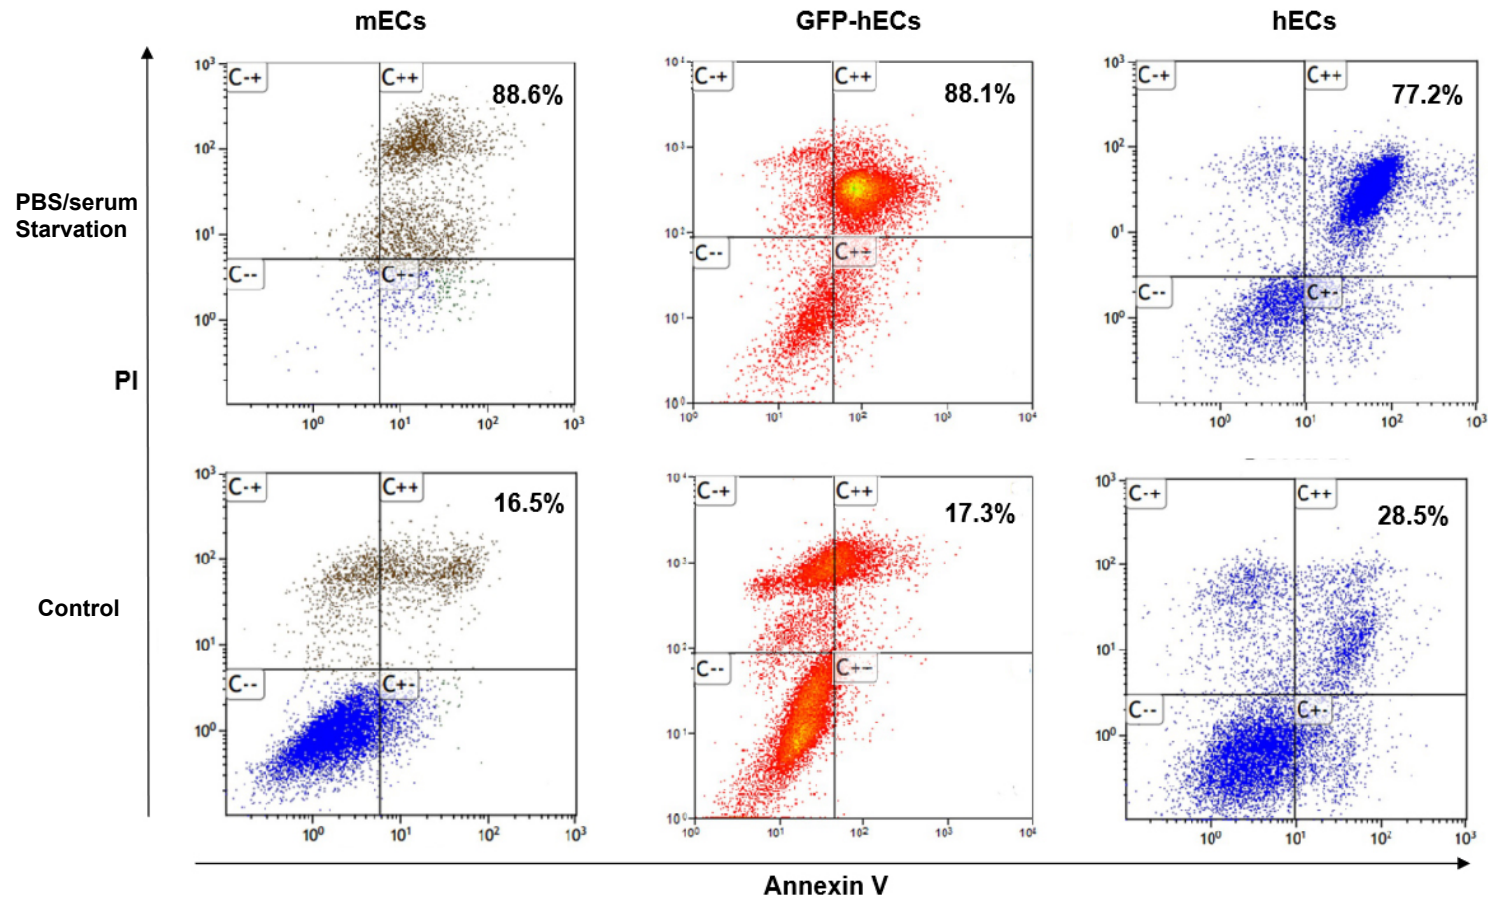

**Appendix A. Induction of apoptosis in mECs, GFP-hECs or hECs.** mECs were cultured in PBS for 48 hours to induce apoptosis. GFP-hECs or hECs were cultured in serum free vascular cell basal medium for 72 hours to induce apoptosis. Apoptotic ECs were identified as Annexin V positive cells including early apoptotic cell in C+- and late apoptotic cells in C++ (or). Percentage shown in the upper corner in scatter plots was the percent of total Annexin V positive cells (C+- plus C++). PI: propidium iodide. Control: cells cultured in complete media.

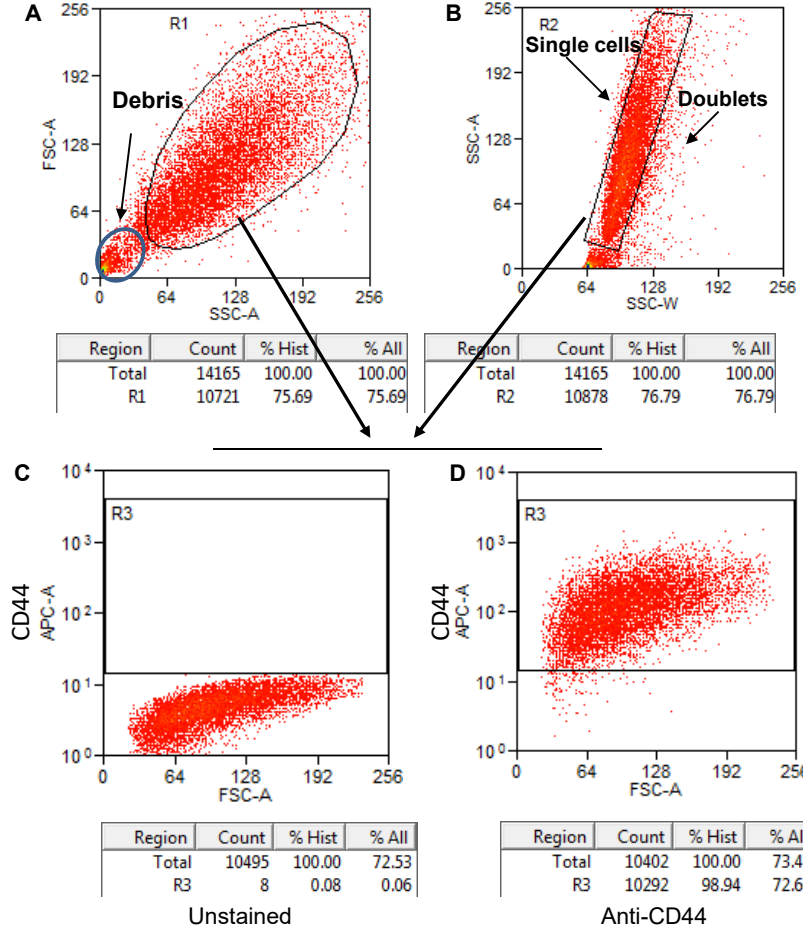

**Appendix B. Gating strategies for Figure 1 and 2.** Single cells (debris and doublets excluded from A and B) were used for analyses. C shows the THP1 cells without any antibody treatment (control). D shows 98.94% THP1 cells incubated with anti-CD44 antibody express CD44.

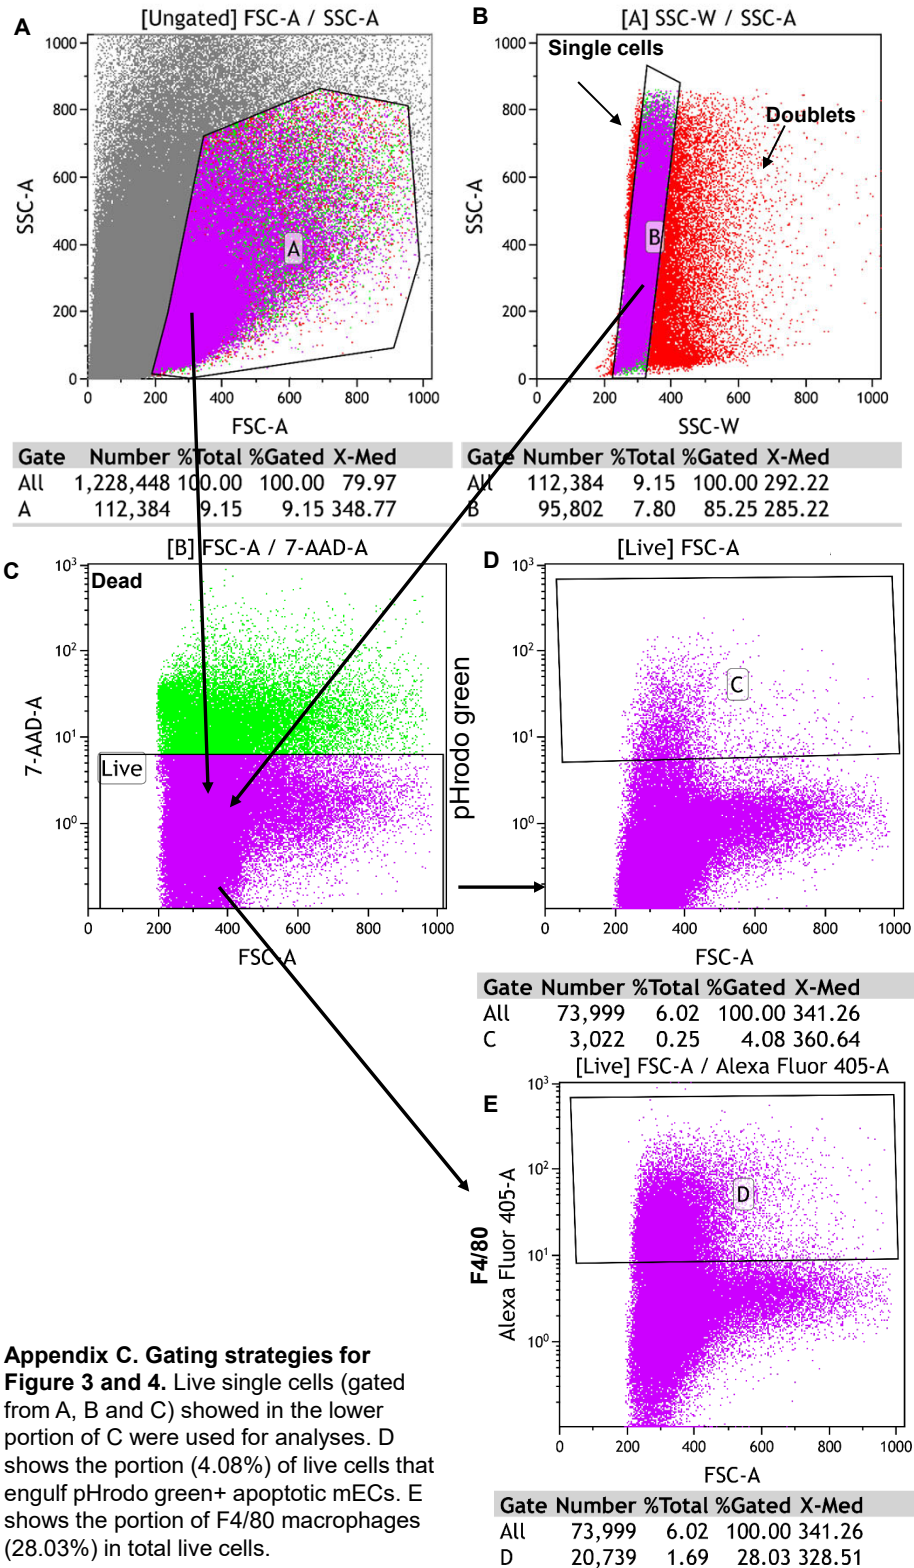

**Appendix C. Gating strategies for Figure 3 and 4.** Live single cells (gated from A, B and C) showed in the lower portion of C were used for analyses. D shows the portion (4.08%) of live cells that engulf pHrodo green+ apoptotic mECs. E shows the portion of F4/80 macrophages (28.03%) in total live cells.

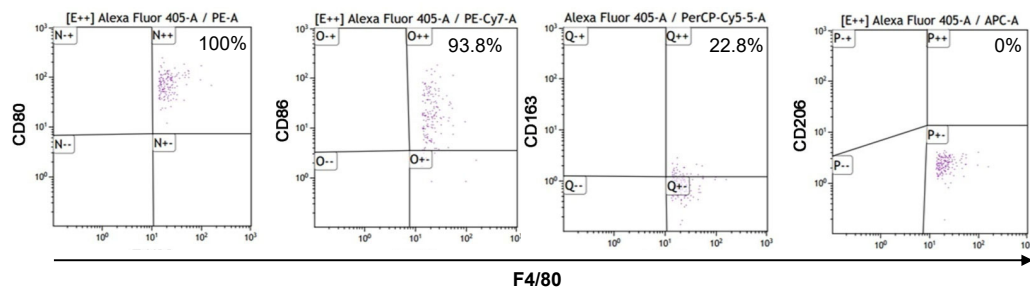

**Appendix D. Expression of CD80, CD86, CD163, and CD206 on F4/80 macrophages with engulfed apoptotic mECs.** Cells used for analyses were from E++ quadrant in the right panel of Fig. 3C (F4/80+ and pHrodo green+ cells which were macrophages with engulfed apoptotic ECs). The number showed in the upper right quadrant on each scatter plot is the percentage of the target marker on F4/80 positive macrophages. Representative results from two experiments are shown.

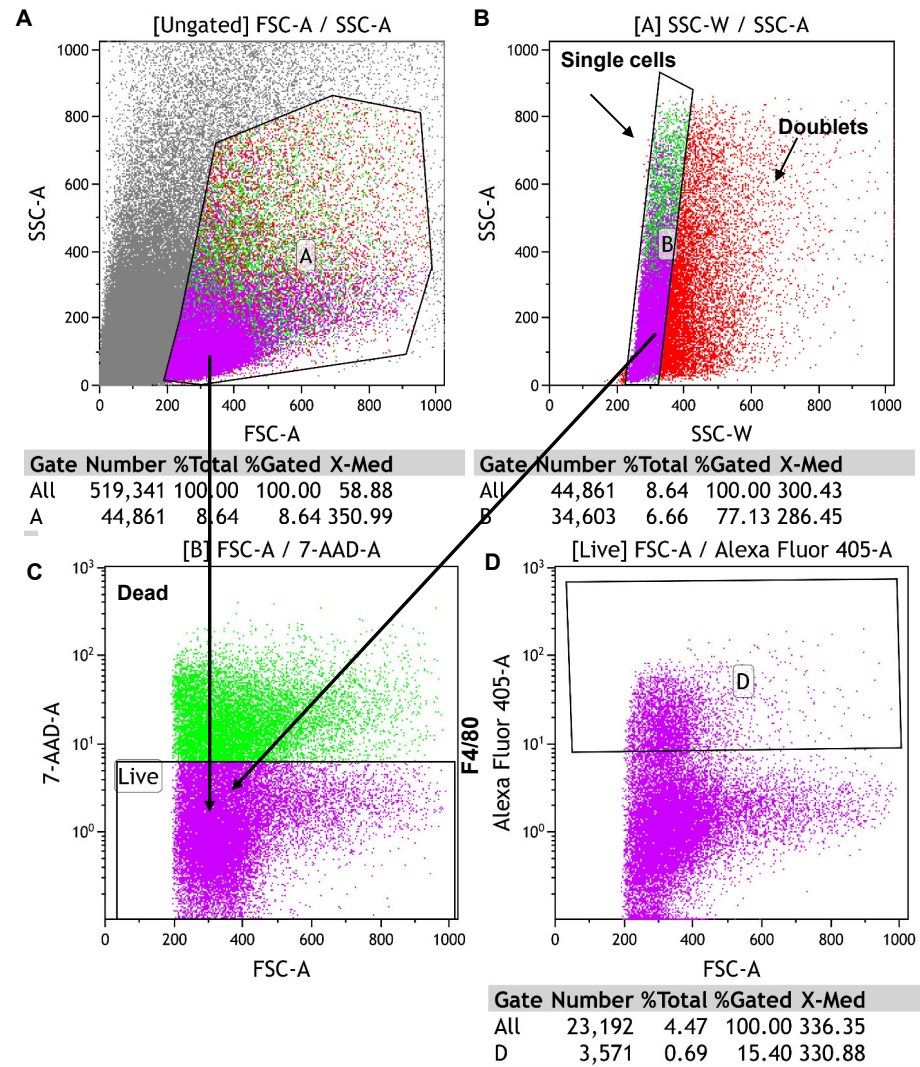

**Appendix E. Gating strategies for Figure 6.** Live single cells (gated from A, B and C) showed in the lower portion of C were used for analyses. D shows the portion of F4/80 macrophages (15.4%) in total live cells.
